# Supplementary figures and images for: Segregation of Fischer–Tropsch reactants on cobalt nanoparticle surfaces
Source: Royal Society of Chemistry journal article supplement (doi:10.1039/c4cc01680g), 2014-01-01

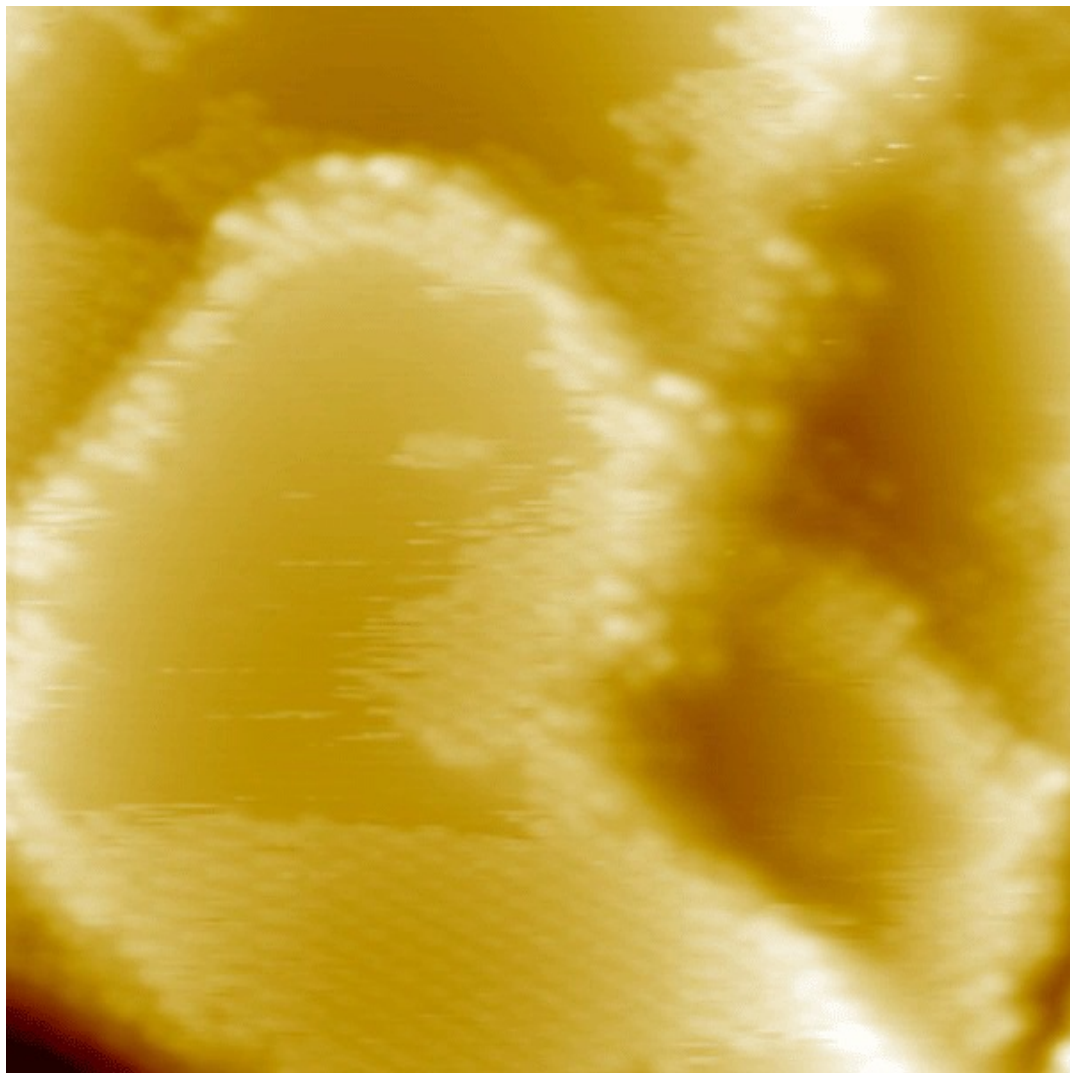

Supplement: c4cc01680g1.pdf [file c4cc01680g1.pdf]
